# Supplementary material
Source: PubMed Central journal article supplement (PMC6125202)
Supplement: NIHMS967896-supplement-3.pdf [file NIHMS967896-supplement-3.pdf]

|    | Condition                              | Effect           |                 |            |
|----|----------------------------------------|------------------|-----------------|------------|
| 1  | +Forskolin (1-10 $\mu$ M)              | negative         | Metabolic       |            |
| 2  | +PPAR $\gamma$ agonists (25 $\mu$ M)   | neutral          |                 |            |
| 3  | +PPAR $\alpha$ agonists (1-50 $\mu$ M) | neutral          |                 |            |
| 4  | +Metformin (10 mM)                     | negative         |                 |            |
| 5  | +AICAR (1 mM)                          | negative         |                 |            |
| 6  | +Compound C (20 $\mu$ M)               | negative         |                 |            |
| 7  | +Palmitic acid (100 mM)                | neutral          |                 |            |
| 8  | Low Glucose (1-10 mM)                  | neutral          |                 |            |
| 9  | +Jag1 (1-10 $\mu$ M)                   | neutral          | Differentiation | Growth and |
| 10 | +Wnt3a (0.5 $\mu$ g/ml)                | neutral          |                 |            |
| 11 | +Wnt5a (0.5 $\mu$ g/ml)                | neutral          |                 |            |
| 12 | +GDF15 (50-500 ng/ml)                  | neutral          |                 |            |
| 13 | +IL11 (100 ng/ml)                      | neutral          |                 |            |
| 14 | +IFN $\beta$ (0.1 U/ml)                | neutral          |                 |            |
| 15 | - Noggin                               | neutral          | Factors         | Standard   |
| 16 | - p38i                                 | positive         |                 |            |
| 17 | -NAC                                   | neutral/positive |                 |            |
| 18 | -TGF $\beta$ i                         | negative/neutral |                 |            |
| 19 | -p38i -TGF $\beta$ i                   | negative/neutral | Combinations    |            |
| 20 | -p38i -NAC                             | positive         |                 |            |
| 21 | -p38i +palmitic acid                   | neutral          |                 |            |
| 22 | -p38i +metformin                       | negative         |                 |            |
| 23 | -p38i +AICAR                           | negative         |                 |            |
| 24 | -p38i +IL11                            | neutral          |                 |            |
| 25 | -p38i +IL11 +Jag1                      | neutral          |                 |            |
| 26 | -p38i + PPAR $\alpha$ agonists         | neutral          |                 |            |
| 27 | -p38i +IFN $\beta$                     | neutral          |                 |            |

**Supplementary Table S1.**

**Table of media conditions tested.** All conditions, are modifications of PrENR media. (+) indicates that a given factor was added to the media, (-) indicates that a standard component was removed from the media. Effect columns indicate the observed or measured effect on growth and/or survival relative to PrENR. When the minus p38i condition is combined with the addition or subtraction of other factors, the effect is relative to the minus p38i-only condition.

| Group                | LuCaP             | Optimal Media               | Site       | Type  |
|----------------------|-------------------|-----------------------------|------------|-------|
| A<br>≥10 generations | 23.1              | -p38i -NAC                  | lymph node | Adeno |
|                      | 77*               | -p38i -NAC (GSK3βi)         | femur      | Adeno |
|                      | 77CR**            | -p38i -NAC                  | femur      | Adeno |
|                      | 141               | -p38 +GSK3βi<br>+LSD1i/MAOi | prostate   | Adeno |
|                      | 145.2             | -p38i                       | lymph node | NE    |
|                      | 147               | -p38i -NAC                  | liver      | Adeno |
|                      | 167*              | -p38i (GSK3βi)              | liver      | Adeno |
|                      | 170.2             | -p38i                       | rib        | Adeno |
|                      | 170.3             | -p38i -NAC                  | liver      | Adeno |
|                      | 173.1             | -p38i -NAC                  | liver      | NE    |
|                      | 189.3             | -p38i                       | adrenal    | Adeno |
| B<br>1-3 generations | 73                | -p38i -NAC                  | prostate   | Adeno |
|                      | 92                | -p38i -NAC                  | lymph node | Adeno |
|                      | 96                | -p38i -NAC                  | prostate   | Adeno |
|                      | 105               | -p38i                       | rib        | Adeno |
|                      | 136               | -p38i -NAC                  | acites     | Adeno |
|                      | 35 <sup>†</sup>   | -p38i -NAC                  | lymph node | Adeno |
|                      | 35CR <sup>†</sup> | -p38i -NAC                  | lymph node | Adeno |
|                      | 86.2              | -p38i -NAC                  | bladder    | Adeno |
|                      | 145.1             | -p38i -NAC                  | liver      | NE    |

Supplementary Table S2.

**Optimal media condition for each LuCaP.** The LuCaPs were arranged into groups based on how long a given LuCaP proliferates *in vitro*. Group A: cultured for at least ten generations. Group B: cultured between 1-3 generations. \* GSK3βi is not required, but enhanced growth in two-week assays when included. \*\* Grows for more than three generations but still testing for growth ≥ 10 generations. † Slow growth rate.

| Site  | Dx                                                           | Culture Start Date | Organoid ID             | Gen | PSA | gain     | loss                               |
|-------|--------------------------------------------------------------|--------------------|-------------------------|-----|-----|----------|------------------------------------|
| Spine | mCRPC adenocarcinoma                                         | 8/2015             | NCI-PC44                | 23  | +   | X        | 3p, 6q, 8p, 10q 13q, 16q, 17p, 18q |
| Neck  | Metastatic, poorly differentiated carcinoma with NE features | 11/2015            | NCI-PC35-1 & NCI-PC35-2 | 21  | +   | 8q       | 8p, 6q                             |
| Liver | Metastatic, poorly differentiated carcinoma                  | 6/2016             | NCI-PC60                | 9   | -   | X, 7, 8q | 2q, 8p, 13q, 16q                   |

**Supplementary Table S3.**

**Patient-derived biopsy samples, cultured as organoids.** Copy number gains and losses determined by Oncoscan array.

Selected CNVs known to be associated with mCRPC are listed.

| Organoid ID | PDX Histology | AR | CK8 | CK5 | P63  | CHGA | SYP |
|-------------|---------------|----|-----|-----|------|------|-----|
| LuCaP 23.1  | AC            | +  | +   | -   | rare | -    | -   |
| LuCaP 73    | AC            | +  | +   | -   | -    | -    | -   |
| LuCaP 77    | AC            | +  | +   | -   | -    | -    | -   |
| LuCaP 92    | AC            | +  | +   | -   | -    | -    | -   |
| LuCaP 136   | AC            | +  | +   | -   | -    | -    | -   |
| LuCaP 141   | AC            | +  | +   | -   | -    | -    | -   |
| LuCaP 145.2 | NE            | -  | +   | -   | -    | +    | +   |
| LuCaP 147   | AC            | +  | +   | -   | -    | -    | -   |
| LuCaP 167   | AC            | +  | +   | -   | rare | -    | -   |
| LuCaP 170.2 | AC            | +  | +   | -   | -    | -    | -   |
| LuCaP 189.3 | AC            | +  | +   | -   | rare | -    | -   |

**Supplementary Table S5.**

**Expression status in organoids, determined by immunofluorescent staining, for the indicated markers. AC = adenocarcinoma; NE = neuroendocrine**
