# Supplementary material
Source: PubMed Central journal article supplement (PMC6125202)
Supplement: NIHMS967896-supplement-4.pdf [file NIHMS967896-supplement-4.pdf]

## Compounds and recombinant proteins

| Name             | Company       | Catalog #   |
|------------------|---------------|-------------|
| Wnt5A            | R&D Systems   | 645-WN-010  |
| Wnt3A            | R&D Systems   | 5036-WN-010 |
| Forskolin        | R&D Systems   | 1099        |
| Metformin        | R&D Systems   | 2864        |
| AICAR            | R&D Systems   | 2840        |
| Compound C       | R&D Systems   | 3093        |
| IFN $\beta$      | R&D Systems   | 8499-IF-010 |
| IL-11            | R&D Systems   | 218-IL-005  |
| GDF15            | R&D Systems   | 6937-GD-010 |
| SB202190         | Sigma-Aldrich | S-7067      |
| N-Acetylcysteine | Sigma-Aldrich | A9165-5G    |
| GW1929           | Sigma-Aldrich | G5668       |
| WY-14643         | Sigma-Aldrich | C7081       |
| Fenofibrate      | Sigma-Aldrich | F6020       |
| palmitic acid    | Sigma-Aldrich | P0500       |

|                 |                       |          |
|-----------------|-----------------------|----------|
| JAG-1           | Anaspec               | AS-61298 |
| BIRB-796        | StemCell Technologies | 72682    |
| CHIR98014       | StemCell Technologies | 73042    |
| Tranylcypromine | StemCell Technologies | 72272    |
| Enzalutamide    | Selleckchem           | S1250    |
| olaparib        | AstraZeneca           |          |

### Antibodies

| Target | company                   | Catalog # |
|--------|---------------------------|-----------|
| CK8    | Covance                   | MMS-16P   |
| AR     | Abcam                     | ab133273  |
| GAPDH  | Abcam                     | ab8245    |
| cMYC   | Abcam                     | ab32072   |
| AKT    | Cell Signaling Technology | 2938S     |
| p-AKT  | Cell Signaling Technology | 9271L     |
| RPS6   | Cell Signaling Technology | 2317S     |
| p-RPS6 | Cell Signaling Technology | 5364      |

|                  |                           |         |
|------------------|---------------------------|---------|
| GSK3 $\beta$     | Cell Signaling Technology | 12456   |
| p-GSK3 $\beta$   | Cell Signaling Technology | 3548    |
| p-GSK3 $\beta$   | Cell Signaling Technology | 5558    |
| $\beta$ -Catenin | Cell Signaling Technology | 9562    |
| p38              | Cell Signaling Technology | 8690    |
| p-p38            | Cell Signaling Technology | 4511    |
| E-cadherin       | Abcam                     | ab40772 |
| CHGA             | Abcam                     | ab15160 |
| p63              | BioCare                   | CM163B  |

### Primers

| Gene   | Forward                      | Reverse                     |
|--------|------------------------------|-----------------------------|
| AR     | 5'-GGAAGCTGCAAGGTCTTCTT-3'   | 5'-CGAAGACGACAAGATGGACAA-3' |
| KLK3   | 5'-CACACCCGCTCTACGATATG-3'   | 5'-GAGGTCCACACACTGAAGTT-3'  |
| NKX3.1 | 5'-AGCCAGAAAGGCACTTGG-3'     | 5'-TCACCTGAGTGTGGGAGAA-3'   |
| PMEPA1 | 5'-GTCTGCACGGTCCTTCATC-3'    | 5'-GATTCCGTTGCCTGACACT-3'   |
| FKBP5  | 5'-AAACGAAGGAGCAACAGTAGAA-3' | 5'-TTGGAATGTCGTGGTCTTCTC-3' |

|       |                                |                                 |
|-------|--------------------------------|---------------------------------|
| UBE2C | '-CCCAACATTGATAGTCCCTTGA-3'    | 5'-GACCTGCTTTGAGTAGGTTTCT-3'    |
| HPRT1 | 5'- CTTTCCTTGGTCAGGCAGTATAA-3' | 5'- AGTCTGGCTTATATCCAACACTTC-3' |
